# Supplementary material for: Loss of Phosphomannose Isomerase Impairs Growth, Perturbs Cell Wall Integrity, and Reduces Virulence of Fusarium oxysporum f. sp. cubense on Banana Plants
Source: MDPI journal article supplement (doi:10.3390/jof9040478), 2023-04-16
Supplement: s1 [file s1]

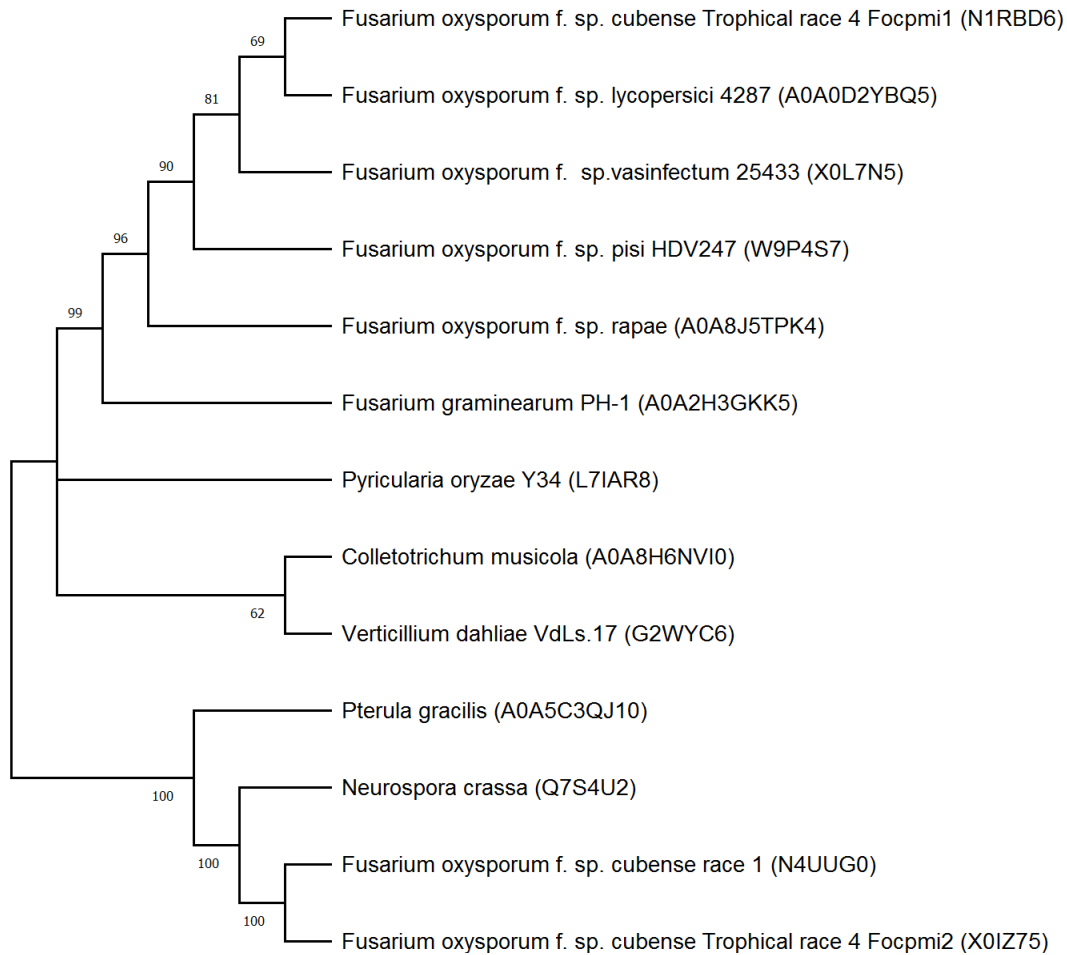

**Figure S1. Phylogenetic analysis of PMI proteins among filamentous fungi.** PMI Protein sequences from *F. oxysporum* f. sp. cubense TR4 (N1RBD6 and X0IZ75), *F. oxysporum* f. sp. pisi HDV247 (W9P4S7), *F. oxysporum* f. sp. vasinfectum (X0L7N5), *F. oxysporum* f. sp. lycopersici 4287 (A0A0D2YBQ5), *F. oxysporum* f. sp. rapae (A0A8J5TPK4), *F. oxysporum* graminearum PH-1 (A0A2H3GKK5), *Pyricularia oryzae* Y34 (L7IAR8), *Colletotrichum musicola* (A0A8H6NVI0), *Verticillium dahlia* Vdls.17 (G2WYC6), *Pterula gracilis* (A0A5C3QJ10), *F. oxysporum* f. sp. cubense race 1 (N4UUG0) and *Neurospora crassa* (Q7S4U2) sequences were downloaded from NCBI and analyzed by MEGA 11 Neighbor joining method with a bootstrap value of 5,000 replicates.

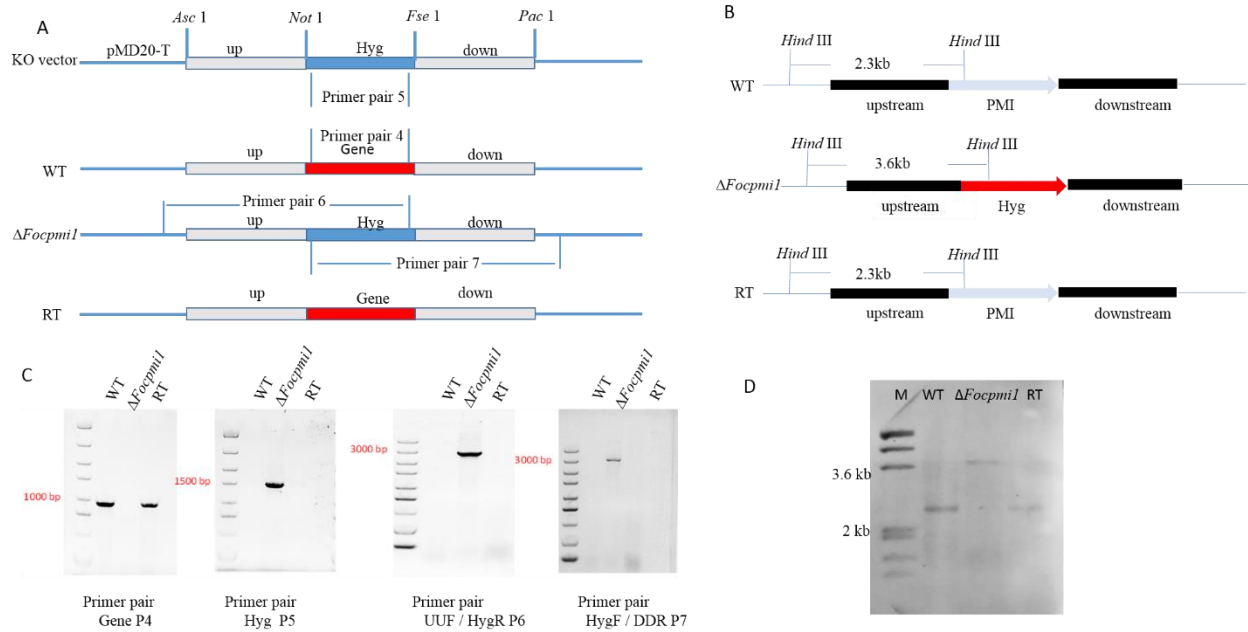

**Figure S2. Schematic representation of strategies for the production and confirmation of  $\Delta Focpmi1$  and RT strains.** A, Strategies to generate the  $\Delta Focpmi1$  mutant and revertant (RT) strains by homologous recombination. WT is wild-type,  $\Delta Focpmi1$  is the mutant, and RT is the revertant strain. B, Genomic cutting sites for southern blotting. C, PCR analysis using four pairs of primers indicated in A. D, verification of the  $\Delta Focpmi1$  mutant and RT strains by southern blotting.

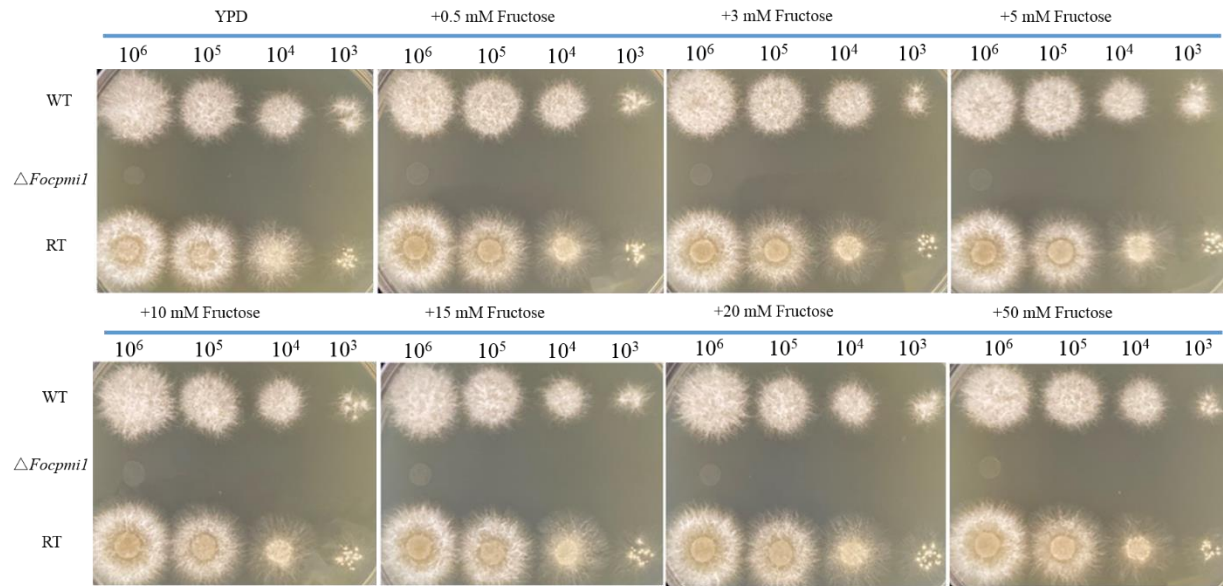

**Figure S3. Growth characterization of the  $\Delta Focpmi1$  at different concentrations of fructose.** Freshly harvested conidia of all the three strains were serially diluted ( $10^6$ - $10^3$ ) and point inoculated on YPD medium amended with different concentrations (0.5, 3, 5, 10, 15, 20 and 50mM) of fructose. The plates were incubated at 28 °C for 48 hours.

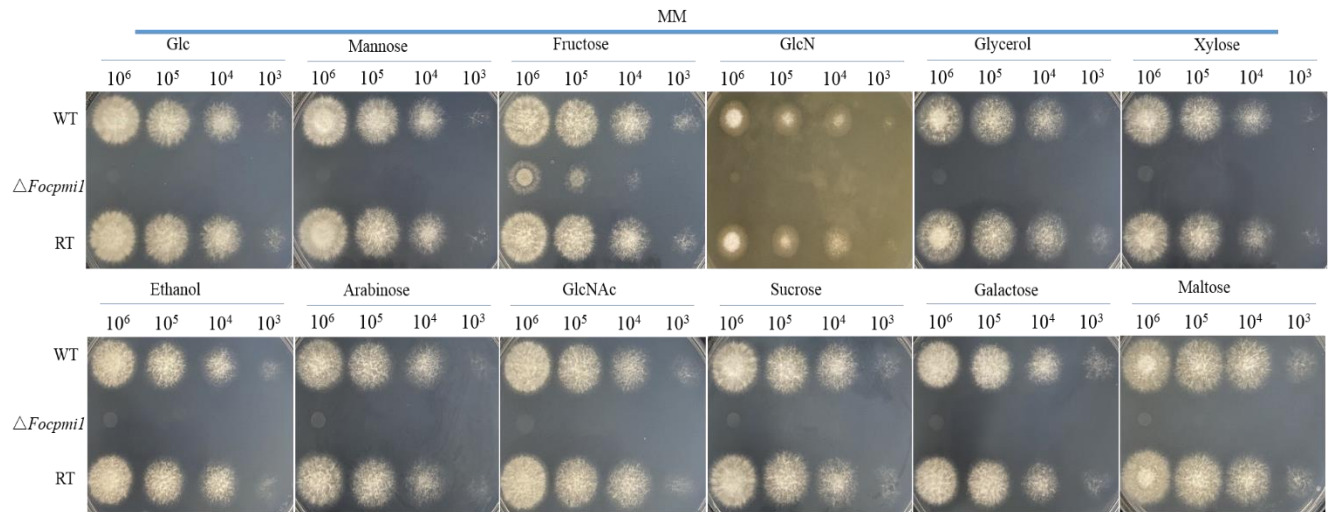

**Figure S4. Growth characterization of the *Focpmi1* mutant on different sugars as sole carbon sources.**

Freshly harvested conidia from all the three strains were point inoculated on MM solid medium plates containing Glc, mannose, fructose, GlcN, glycerol, xylose, ethanol, arabinose, N-acetylglucosamine (GlcNAc), Sucrose, galactose and maltose. The plates were incubated at 28 °C for 48 hours.

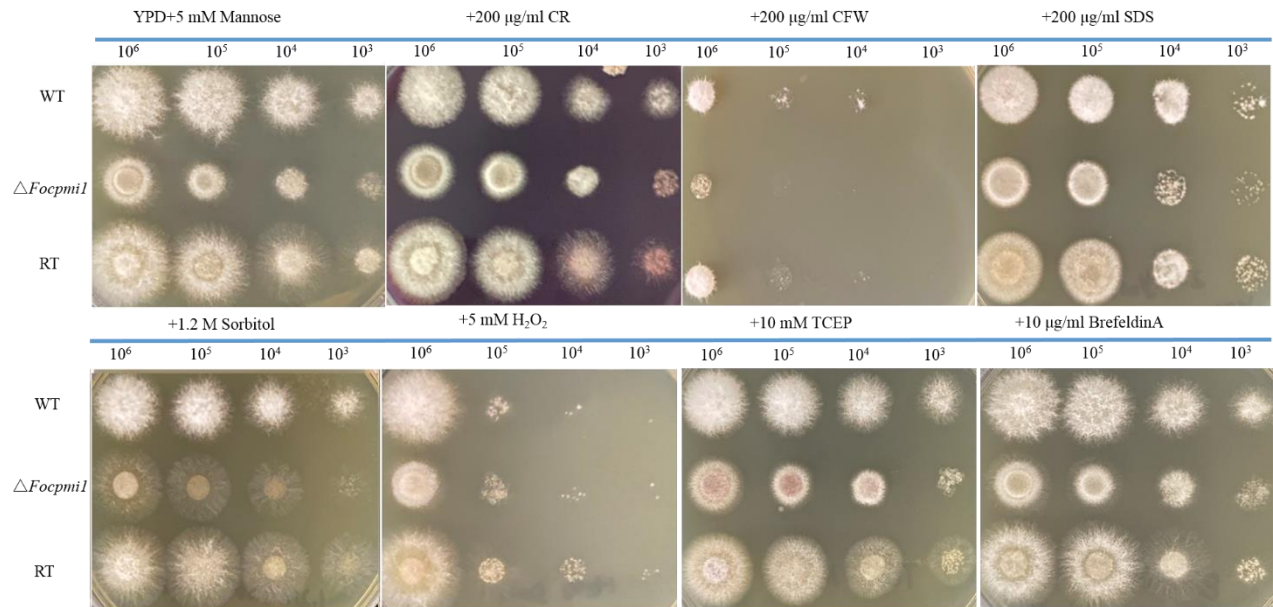

**Figure S5. Cell wall integrity analysis and sensitivity towards osmotic, and ER stress in YPD medium.**

Freshly harvested serially diluted conidia 10<sup>6</sup>-10<sup>3</sup> were point inoculated onto YPD medium plates supplemented with 300 µg/ml CR, 50 µg/ml CFW, 200 µg/ml SDS, 1.2 M sorbitol, 5 mM H<sub>2</sub>O<sub>2</sub>, 10 mM TCEP and 10 µg/ml Brefeldin A. The plates were photographed after 48 hours of incubation at 28 °C.

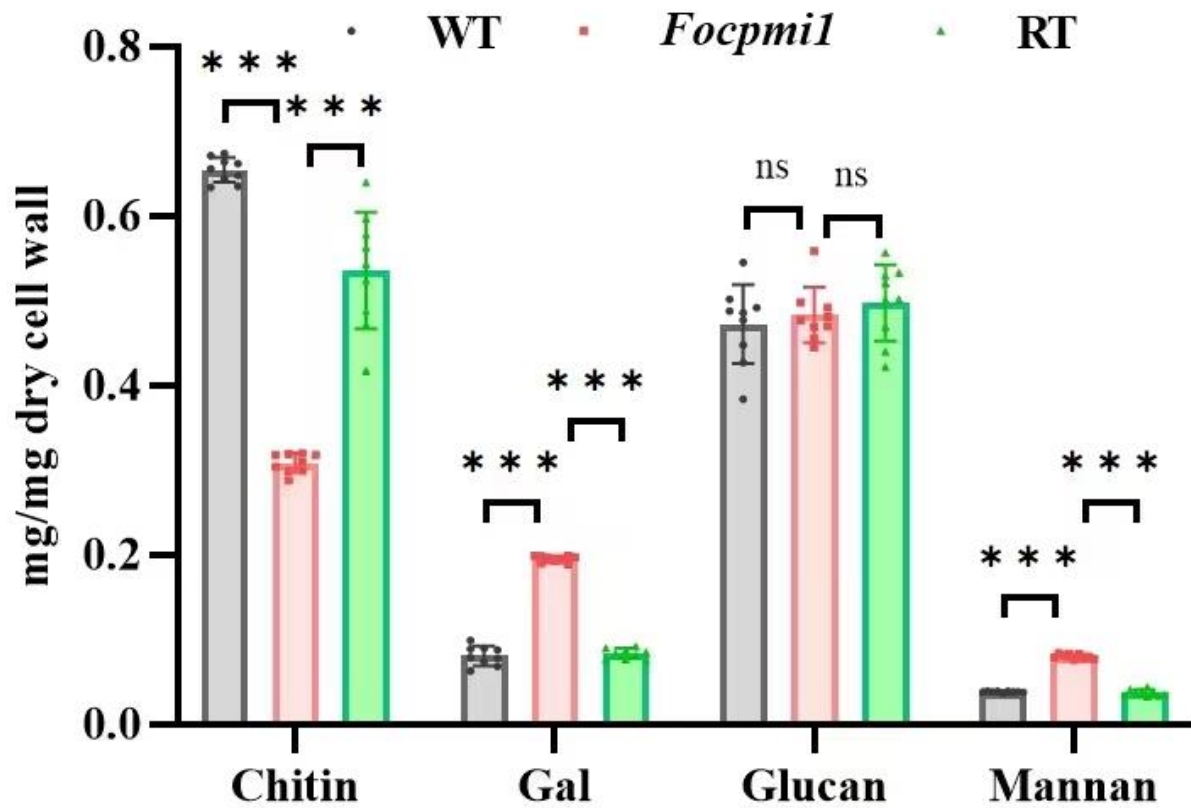

Figure S6. Cell wall content analysis of  $\Delta Focpmi1$  strain.  $2 \times 10^8$  conidia of WT,  $\Delta Focpmi1$  and RT strains were inoculated in MMM liquid medium and incubated at 28 °C for 72 hours. Dried mycelia (10 mg) were used for the cell wall contents quantification. The experiment was conducted in three biological replicates.

**Table S1. Primers used in the study**

| Primers                                   | Primer sequences (5'-3')                 | Length (bp) | Remark                             |
|-------------------------------------------|------------------------------------------|-------------|------------------------------------|
| <b>P1</b>                                 |                                          |             |                                    |
| <i>Focpmi1</i> -up-F<br>( <i>AscI</i> )   | TT GGC GCGCC GAA GCA CAT CAA GCG TTG GTT | 1185        | <i>Focpmi1</i> mutant construction |
| <i>Focpmi1</i> -up-R<br>( <i>NotI</i> )   | ATAAGAATGCGGCCGCATTTGCGATGTTTCGTTGTTGG   |             |                                    |
| <b>P2</b>                                 |                                          |             |                                    |
| Hyg-F ( <i>NotI</i> )                     | ATAAGAATGCGGCCGCGACAGAAGATGATATTGAAGG    | 1429        | <i>Focpmi1</i> mutant construction |
| Hyg- R ( <i>FseI</i> )                    | TATGGCCGGCCGATTTTCAGTAACGTTAAGTGG        |             |                                    |
| <b>P3</b>                                 |                                          |             |                                    |
| <i>Focpmi1</i> -down-F<br>( <i>FseI</i> ) | TAT GGCCGGCC ATGATATTGGAGTGATGTGAG       | 1119        | <i>Focpmi1</i> mutant construction |
| <i>Focpmi1</i> -down-R<br>( <i>PacI</i> ) | CC TTAATTAA CGA CGT AAT ATC TCG ACT ATG  |             |                                    |
| <b>P4</b>                                 |                                          |             |                                    |
| <i>Focpmi1</i> Gene-F                     | TCTCCTCCCACTACGGCAACA                    | 944         | Mutant and revertant confirmation  |
| <i>Focpmi1</i> Gene-R                     | AGCGATCCTTCCCTTCCACT                     |             |                                    |
| <b>P5</b>                                 |                                          |             |                                    |
| Hyg-F                                     | GACAGA AGATGATATTGAAGG                   | 1429        | Mutant and revertant confirmation  |
| Hyg-R                                     | GATTTTCAGTAAC GTTAAGTGG                  |             |                                    |
| <b>P6</b>                                 |                                          |             |                                    |
| <i>Focpmi1</i> -UUF                       | GGGCATTCCACTGTCTGTTGT                    | 2865        | Mutant and revertant               |

|                                         |                                   |      |                                       |
|-----------------------------------------|-----------------------------------|------|---------------------------------------|
| Hyg-R                                   | GAT TTC AGT AAC GTT AAG TGG       |      | confirmation                          |
| <b>P7</b>                               |                                   |      | Mutant and                            |
| Hyg-F                                   | GAC AGA AGA TGA TAT TGA AGG       | 2874 | revertant                             |
| <i>Focpmi1</i> -DDR                     | CCTGTCCGACATAGCTGTTCCA            |      | confirmation                          |
| <b>P8</b>                               |                                   |      |                                       |
| <i>Focpmi1</i> -UUF                     | GGGCATTCCACTGTCTGTTGT             | 4286 | Revertant                             |
| <i>Focpmi1</i> -DDR                     | CCTGTCCGACATAGCTGTTCCA            |      | construction                          |
| <b>P9</b>                               |                                   |      |                                       |
| <i>Focpmi1</i> RT-F                     | AAGGTGTTACGGATGAGAAGAAGAAGT       | 236  | qRT-PCR                               |
| <i>Focpmi1</i> RT-R                     | GAAGAAGAGCACAAAGCAACCAAT          |      |                                       |
| <b>P10</b>                              |                                   |      |                                       |
| <i>Focpmi2</i> RT-F                     | TACGCCAGAAGCCTTTGAGAC             | 246  | qRT-PCR                               |
| <i>Focpmi2</i> RT-R                     | TAGGTTGCCAGGGTCGTTTGC             |      |                                       |
| <b>P11</b>                              |                                   |      |                                       |
| <i>FocEF1<math>\alpha</math></i> - F    | CCCAAGGCTGTCGCTTTCGTC             | 191  | qRT-PCR                               |
| <i>FocEF1<math>\alpha</math></i> -R     | AGACGGAGGGGCTTGTC AACG            |      |                                       |
| <b>P12</b>                              |                                   |      |                                       |
| <i>Focpmi2</i> -up-F<br>( <i>AscI</i> ) | TT GGCGCGCC GACATTTGCAATACTTAGACG | 1147 | <i>Focpmi2</i> mutant<br>construction |



|                                           |                                          |      |                                       |
|-------------------------------------------|------------------------------------------|------|---------------------------------------|
| <i>Focpmi2</i> -up-R<br>( <i>NotI</i> )   | ATAAGAATGCGGCCGCATGACTATGACGATTAAC GAA   |      |                                       |
| <b>P13</b>                                |                                          |      |                                       |
| <i>Focpmi2</i> -down-F<br>( <i>FseI</i> ) | TAT GGCCGGCC CGA CAT TTT GAG ATT CAA TGC | 1190 | <i>Focpmi2</i> mutant<br>construction |
| <i>Focpmi2</i> -down-R<br>( <i>PacI</i> ) | CC TTAATTAA ATC GAC ATC CTG AGT TTA TAG  |      |                                       |

**Table S2. Genes responsible for plant cell wall degrading enzymes.**

| Gene ID        | FDR      | log2FC   | Predicted function                      |
|----------------|----------|----------|-----------------------------------------|
| Focb16_v004426 | 2.10E-06 | -7.2308  | Carboxylic ester hydrolase              |
| Focb16_v000085 | 2.38E-11 | -2.44834 | Carboxylic ester hydrolase              |
| Focb16_v011188 | 1.22E-06 | -7.33859 | Acetylxylan esterase 2                  |
| Focb16_v014173 | 3.95E-05 | -2.41913 | Alpha-glucosidase 2                     |
| Focb16_v000244 | 0.000414 | -3.42482 | Beta-glucosidase 4                      |
| Focb16_v000177 | 6.41E-12 | -2.80639 | Glycerophosphodiester phosphodiesterase |
| Focb16_v003281 | 1.22E-16 | -3.98028 | Beta-glucosidase                        |
| Focb16_v011585 | 9.11E-09 | -2.50828 | Putative beta-glucosidase C             |
| Focb16_v002629 | 5.63E-16 | -2.5294  | Mannan endo-1,6-alpha-mannosidase       |
| Focb16_v014263 | 3.40E-10 | -5.97382 | Beta-mannosidase B                      |

|                |          |          |                                    |
|----------------|----------|----------|------------------------------------|
|                |          |          |                                    |
| Focb16_v015639 | 1.19E-35 | -5.91848 | Mannan endo-1,6-alpha-mannosidase  |
| Focb16_v002729 | 1.77E-23 | -6.59788 | Endo-beta-1,4-glucanase D          |
| Focb16_v004733 | 2.41E-08 | -4.95047 | Putative endo-beta-1,4-glucanase D |
| Focb16_v007553 | 9.92E-24 | -4.15232 | Endoglucanase-4                    |
| Focb16_v009544 | 7.22E-23 | -2.35588 | chitinase                          |
| Focb16_v005330 | 1.06E-15 | -6.31701 | Beta-L-arabinobiosidase            |
| Focb16_v004994 | 0.002243 | -5.13582 | alpha-L-fucosidase                 |
| Focb16_v011413 | 0.000117 | -4.32552 | Alpha-L-fucosidase 2               |
| Focb16_v000310 | 1.08E-56 | -4.63723 | Putative pectin lyase D            |
| Focb16_v003939 | 2.07E-63 | -3.33653 | Glycosidase                        |
| Focb16_v008003 | 2.80E-05 | -3.76292 | Peptidoglycan deacetylase          |

|                |          |          |                                             |
|----------------|----------|----------|---------------------------------------------|
|                |          |          |                                             |
| Focb16_v011761 | 3.17E-37 | -4.11241 | Glycosidase                                 |
| Focb16_v012948 | 7.03E-07 | -7.4379  | Unsaturated glucuronyl hydrolase            |
| Focb16_v013479 | 2.70E-45 | -2.96048 | Phosphotransferase                          |
| Focb16_v013482 | 2.16E-17 | -4.11972 | N-acetylglucosamine-6-phosphate deacetylase |
